# Supplementary material for: Impact of Co-Occurrence of Obesity and SARS-CoV-2 Infection during Pregnancy on Placental Pathologies and Adverse Birth Outcomes: A Systematic Review and Narrative Synthesis
Source: MDPI journal article supplement (doi:10.3390/pathogens12040524), 2023-03-27
Supplement: s1 [file s1]

**Supplementary Table S1:** Included studies in review of maternal SARS-CoV-2 and elevated BMI pregnancies

| Author                          | Publication Year | Title                                                                                                                                                          | Article type | Viral infection |
|---------------------------------|------------------|----------------------------------------------------------------------------------------------------------------------------------------------------------------|--------------|-----------------|
| Ritchmann                       | 2020             | Fetal deaths in pregnancies with SARS-CoV-2 infection in Brazil: A case series                                                                                 | Case series  | SARS-CoV-2      |
| Schwartz                        | 2020             | Chronic Histiocytic Intervillositis With Trophoblast Necrosis Is a Risk Factor Associated With Placental Infection From Coronavirus Disease 2019 (COVID-19)    | Case series  | SARS-CoV-2      |
| Menter                          | 2021             | Placental Pathology Findings during and after SARS-CoV-2 Infection: Features of Villitis and Malperfusion                                                      | Case series  | SARS-CoV-2      |
| Fan                             | 2021             | No obviously adverse pregnancy complications and outcomes of the recovered pregnant women from COVID-19                                                        | Case series  | SARS-CoV-2      |
| Jang                            | 2021             | Pregnancy Outcome, Antibodies, and Placental Pathology in SARS-CoV-2 Infection during Early Pregnancy                                                          | Case series  | SARS-CoV-2      |
| Hanna                           | 2021             | Underestimation of SARS-CoV-2 infection in placental samples                                                                                                   | Case series  | SARS-CoV-2      |
| Watkins                         | 2021             | Defining Severe Acute Respiratory Syndrome Coronavirus 2 (SARS-CoV-2) Placentitis                                                                              | Case series  | SARS-CoV-2      |
| Adhikari                        | 2020             | Pregnancy Outcomes Among Women With and Without Severe Acute Respiratory Syndrome Coronavirus 2 Infection                                                      | Cohort       | SARS-CoV-2      |
| Lu-Culligan                     | 2021             | Maternal respiratory SARS-CoV-2 infection in pregnancy is associated with a robust inflammatory response at the maternal-fetal interface                       | Cohort       | SARS-CoV-2      |
| Patberg                         | 2021             | Coronavirus disease 2019 infection and placental histopathology in women delivering at term                                                                    | Cohort       | SARS-CoV-2      |
| Brien                           | 2021             | Pandemic stress and SARS-CoV-2 infection are associated with pathological changes at the maternal-fetal interface                                              | Cohort       | SARS-CoV-2      |
| Joseph                          | 2021             | Maternal Antibody Response, Neutralizing Potency, and Placental Antibody Transfer After Severe Acute Respiratory Syndrome Coronavirus 2 (SARS-CoV-2) Infection | Cohort       | SARS-CoV-2      |
| Rosembloom                      | 2021             | Coronavirus disease 2019 infection and hypertensive disorders of pregnancy                                                                                     | Cohort       | SARS-CoV-2      |
| Articles removed from the study |                  |                                                                                                                                                                |              |                 |

|               |      |                                                                                                                                                           |        |     |
|---------------|------|-----------------------------------------------------------------------------------------------------------------------------------------------------------|--------|-----|
| Okunade       | 2019 | Selenium deficiency and pregnancy outcome in pregnant women with HIV in Lagos, Nigeria                                                                    | Cohort | HIV |
| Zash          | 2021 | Maternal weight and birth outcomes among women on antiretroviral treatment from conception in a birth surveillance study in Botswana                      | Cohort | HIV |
| Hirudayakanth | 2021 | Mid-thigh circumference as an indicator of nutritional status to predict adverse pregnancy outcomes among HIV-infected and HIV-uninfected women in Malawi | Cohort | HIV |

**Supplementary Table S2:** Maternal co-morbidities in maternal SARS-CoV-2 infection and overweight/obesity during pregnancy in each study included in this review. The comorbidities most frequently reported in the majority of the selected studies (n=13) were diabetes (8/13), a form of hypertension (chronic hypertension or pregnancy induced hypertension) (7/13) and gestational diabetes (6/13).

| Study              | Study type      | Maternal comorbidities                                                                                                                                                                                                                                             |
|--------------------|-----------------|--------------------------------------------------------------------------------------------------------------------------------------------------------------------------------------------------------------------------------------------------------------------|
| Schwartz (2020)    | Case series     | Gestational diabetes<br>Diabetes<br>Recurrent bacterial infections<br>Idiopathic thrombocytopenia                                                                                                                                                                  |
| Menter (2021)      | Case series     | Maternal age<br>Gestational diabetes<br>Smoking<br>Pollinosis                                                                                                                                                                                                      |
| Fan (2021)         | Case series     | Gestational diabetes<br>Diabetes<br>Mild preeclampsia<br>Pregnancy induced hypertension                                                                                                                                                                            |
| Watkins (2021)     | Case series     | Pregnancy induced hypertension                                                                                                                                                                                                                                     |
| Adhikari (2020)    | Cohort          | Diabetes<br>Gestational diabetes<br>Chronic hypertension<br>Preeclampsia with severe features                                                                                                                                                                      |
| Brien (2021)       | Cohort – Canada | Pregnancy induced hypertension<br>Diabetes                                                                                                                                                                                                                         |
| Brien (2021)       | Cohort – UK     | Diabetes                                                                                                                                                                                                                                                           |
| Patberg (2021)     | Cohort          | Diabetes<br>Gestational diabetes<br>Preeclampsia                                                                                                                                                                                                                   |
| Lu-Culligan (2021) | Cohort          | Diabetes<br>Hypertension<br>Preeclampsia                                                                                                                                                                                                                           |
| Rosembloom (2021)  | Cohort          | Chronic hypertension<br>Gestational hypertension<br>Diabetes<br>Gestational diabetes<br>Hypertensive disorder of pregnancy<br>History of hypertensive disorder of pregnancy<br>Smoking<br>Current substance abuse<br>Preeclampsia with and without severe features |

|                  |             |                                                                                                |
|------------------|-------------|------------------------------------------------------------------------------------------------|
| Joseph (2021)    | Cohort      | Asthma (other pulmonary conditions)<br>Chronic hypertension<br>Diabetes<br>HIV & mental health |
| Ritchmann (2020) | Case series | Not applicable                                                                                 |
| Jang (2021)      | Case series | Not applicable                                                                                 |
| Hanna (2021)     | Case series | Not applicable                                                                                 |

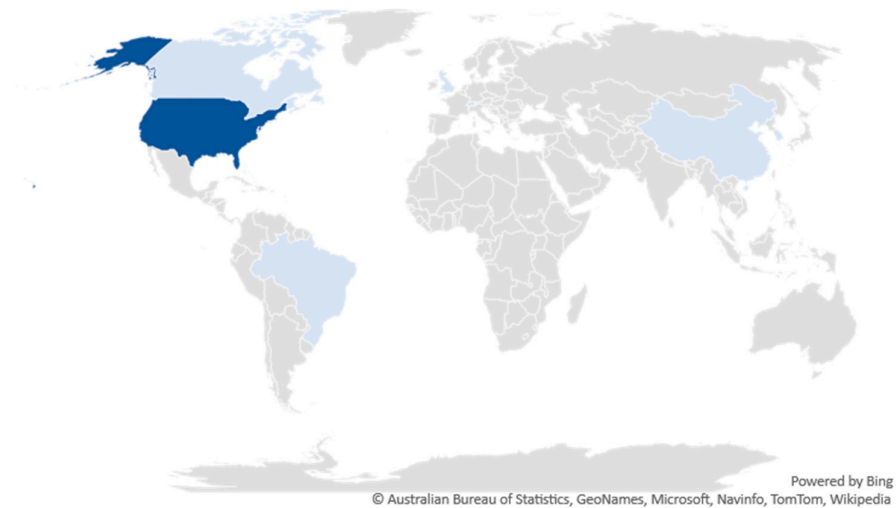

Number of studies 1 7

**Supplementary Figure S1:** World heatmap illustrating geographical location of each study included in the review. Data are shown for 13 studies from at least different 7 countries (one of the studies, Schwartz. *et al*, included patients from 5 different countries however, locations were not mentioned). Increasing study counts are represented by darker colours. 53% of the studies (n=7) were located in the United States of America. And the other 50% (n=6) were located in Canada, United Kingdom, Brazil, Switzerland, China, Korea.
